# Supplementary material
Source: HighWire-hosted journal article supplement (https://bmjopen.bmj.com/content/7/8/e016113)
Supplement: inline-supplementary-material-2 [file inline-supplementary-material-2.pdf]

Supplementary Figure 2.  
Rapid strategy based on  
EPISTEMONIKOS

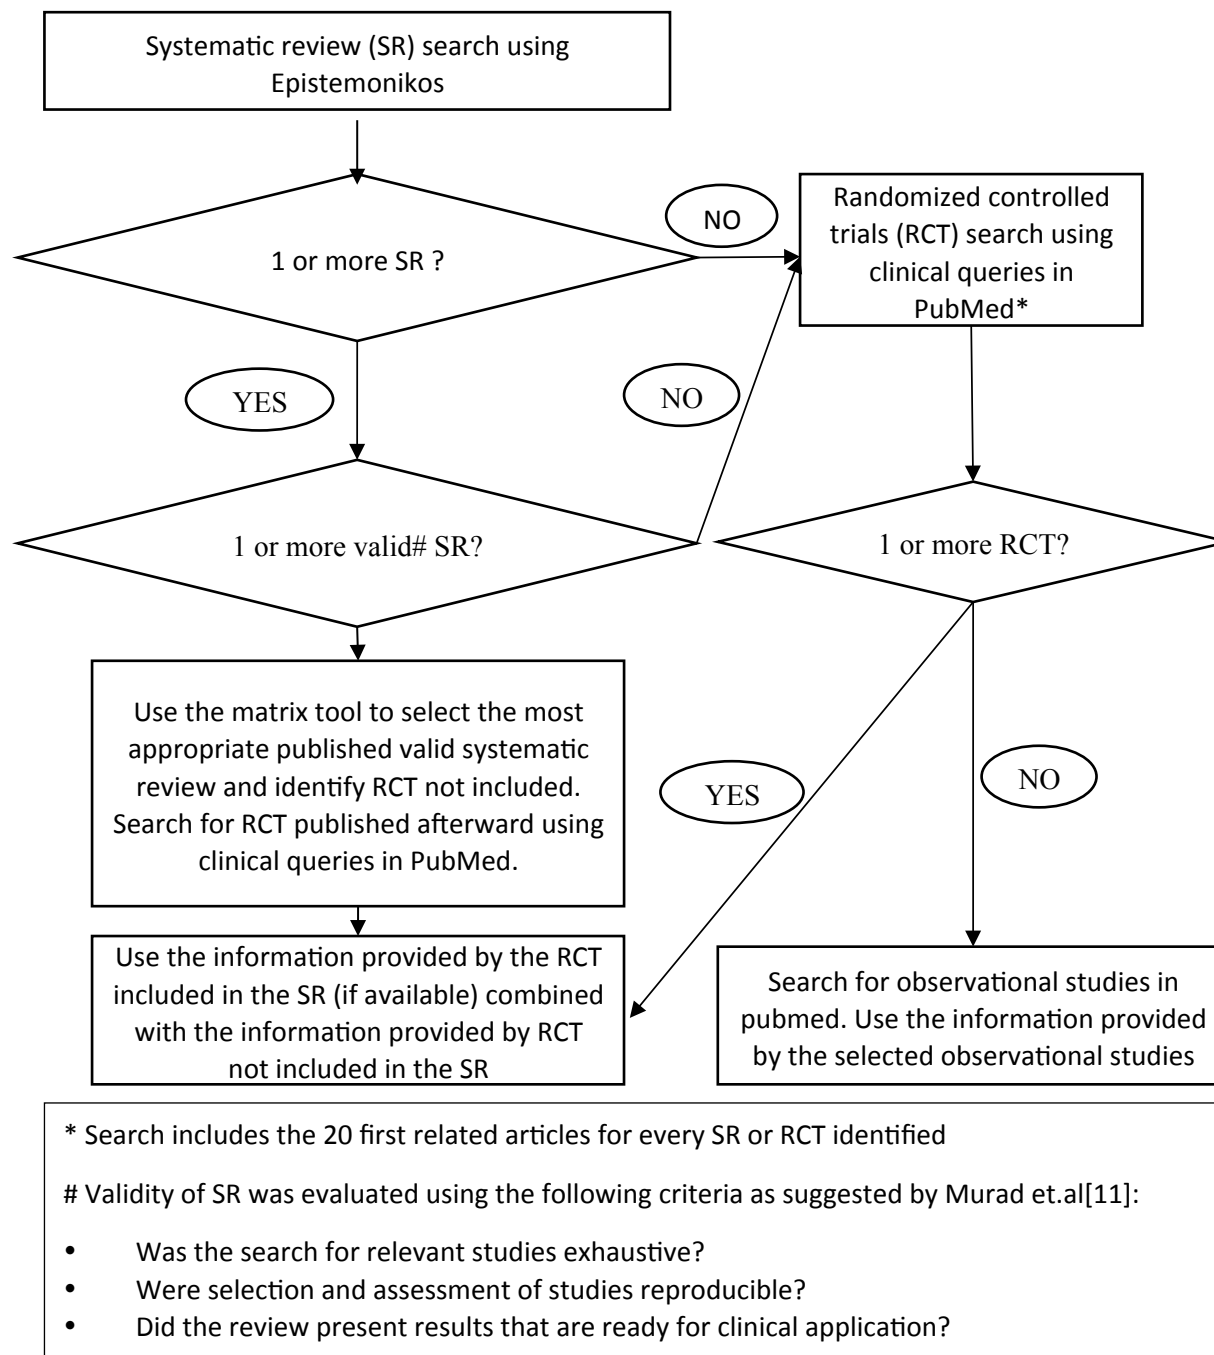

# Murad MH, Montori VM, Ioannidis JP, et al. How to read a systematic review and meta-analysis and apply the results to patient care: users' guides to the medical literature. *JAMA* 2014;312:171–9
