# Supplementary material
Source: HighWire-hosted journal article supplement (https://bmjopen.bmj.com/content/7/8/e016113)
Supplement: inline-supplementary-material-4 [file inline-supplementary-material-4.pdf]

**Supplementary table 2. PICO questions**

| Nr. | Population                                                                                    | Intervention                             | Comparison                              | Outcomes                                                                                      |
|-----|-----------------------------------------------------------------------------------------------|------------------------------------------|-----------------------------------------|-----------------------------------------------------------------------------------------------|
| 1   | Patient with acute asthma and upper airway infection                                          | Antibiotics                              | No antibiotics                          | Mortality                                                                                     |
| 2   | Renal transplant patient with pleural TB                                                      | Steroids                                 | No steroids                             | Resolution time, complications and mortality                                                  |
| 3   | Patient with atrial fib on anticoagulants undergoing a breast biopsy                          | Stopping anticoagulant                   | Not stopping anticoagulant              | Bleeding risk, thromboembolic event risk, mortality                                           |
| 4   | Patient with severe hypokalemia (< 2.5 meq/l)                                                 | Intravenous potassium                    | Oral potassium                          | Arrhythmia, morbidity and mortality                                                           |
| 5   | Patient with prosthetic valve endocarditis by MSSA                                            | Cephalosporin+rifampicin+gentamicin      | Cephalosporin+rifampicin                | Complications, mortality                                                                      |
| 6   | Patient with pericardial TB                                                                   | Steroids                                 | Placebo                                 | Death, symptomatic improvement, sequel                                                        |
| 7   | Transplant patient with CMV resistant systemic infection                                      | IV gammaglobulin                         | No IV Gamaglobulin                      | All cause mortality, CMV related mortality, time to viral load negativization, adverse events |
| 8   | Patient with congestive heart failure                                                         | IV furosemide bolus                      | IV furosemide continuous infusion       | Mortality, adverse events, arrhythmia                                                         |
| 9   | Patient with upper gastrointestinal bleeding, forrest III peptic ulcer and pulmonary embolism | Anticoagulants                           | Vena cava filter and prophylaxis        | Major bleeding, upper gastrointestinal bleeding, PE mortality, all-cause mortality            |
| 10  | Patient with atrial fibrillation and CHADS score > 1                                          | Watchman plus antiplatelet therapy       | Anticoagulation                         | Thromboembolic events, major bleeding, all cause mortality                                    |
| 11  | Patient with acute ischemic stroke                                                            | Statins                                  | Placebo                                 | Recurrent stroke, all cause mortality                                                         |
| 12  | Patient undergoing neurosurgery for malignant disease                                         | Early thromboprophylaxis with enoxaparin | Late thromboprophylaxis with enoxaparin | Surgical bleeding, major bleeding, thromboembolic events, mortality                           |
| 13  | Patient with acute diarrhea                                                                   | Fecal leucocyte to guide therapy         | No fecal leucocyte analysis             | Morbidity, mortality                                                                          |
| 14  | Inpatient with                                                                                | Antibiotics AND                          | Antibiotics                             | Mortality, hospital                                                                           |

|    |                                                        |                                                           |                                                     |                                                    |
|----|--------------------------------------------------------|-----------------------------------------------------------|-----------------------------------------------------|----------------------------------------------------|
|    | pneumonia                                              | steroids                                                  |                                                     | stay, mechanical ventilation requirement, ICU stay |
| 15 | Patient with catheter related deep venous thrombosis   | Anticoagulation and extraction                            | Wait and watch                                      | Pulmonary embolism, stroke, death                  |
| 16 | Patient with distal inferior limb deep vein thromboses | Anticoagulation                                           | No anticoagulation                                  | Pulmonary embolism, mortality                      |
| 17 | Patient with traumatic splenic laceration              | Splenectomy                                               | Wait and watch                                      | Mortality, hemoperitoneum                          |
| 18 | Adult with asymptomatic celiac disease                 | Gluten free diet                                          | No treatment                                        | Quality of life, cancer                            |
| 19 | Patient with stable COPD                               | Non invasive mechanical ventilation                       | Standard treatment                                  | Mortality, quality of life                         |
| 20 | Adult with facial cellulitis                           | Antibiotics and steroids                                  | Antibiotics only                                    | Symptomatic improvement                            |
| 21 | Patient with skin-soft tissue infection by MRSA        | Linezolid                                                 | Vancomycin, clindamicin, TMS                        | Death, sepsis, cure                                |
| 22 | Patient with obstructive renal failure                 | Ureteral stent                                            | Nephrostomy                                         | Long term improvement of renal function            |
| 23 | Patient with hypogammaglobulinemia AND acute infection | Immunoglobulin                                            | No immunoglobulin                                   | Symptomatic improvement, death, complications      |
| 24 | Patient with supratentorial brain tumor                | Antiepileptic drugs, primary prevention                   | No primary prevention                               | Seizures, death, adverse events                    |
| 25 | Patient undergoing knee arthroplasty                   | Extended thromboprophylaxis with new oral anticoagulants. | Extended thromboprophylaxis with low weight heparin | DVT, PE, death, bleeding                           |
| 26 | Patient with recurrent cellulitis                      | prophylactic antibiotic                                   | No prophylactic antibiotic                          | New cellulitis, adverse events                     |
| 27 | Patient with hepatic encephalopathy                    | Rifaximin AND lactulose                                   | Lactulose                                           | Death, symptomatic improvement, adverse events     |
| 28 | Patient with incidental brain aneurysm                 | Coil                                                      | No coil                                             | Bleeding, mortality, adverse events                |
| 29 | Patient with traumatic subarachnoid hemorrhage         | Nimodipin                                                 | No nimodipin                                        | Vasospasm, death, adverse effects                  |
| 30 | Patient with renal failure by Wegener's                | Rituximab                                                 | Standard treatment                                  | Death, end stage renal failure,                    |

|    |                                                                                        |                                                                          |                               |                                                                          |
|----|----------------------------------------------------------------------------------------|--------------------------------------------------------------------------|-------------------------------|--------------------------------------------------------------------------|
|    | granulomatosis                                                                         |                                                                          | (Cyclophosphamide)            | adverse event                                                            |
| 31 | Patient with acute pancreatitis                                                        | Early enteral feeding                                                    | Late feeding                  | Muerte, morbilidad, días de internación. death, morbidity, hospital stay |
| 32 | Patient with dyspnea and heart failure vs acute COPD                                   | pro-BNP to guide management                                              | No pro-BNP                    | Symptomatic improvement, death                                           |
| 33 | Patient with acute asthma                                                              | IV magnesium                                                             | No IV magnesium               | Symptomatic improvement, hospital stay, death                            |
| 34 | Patient with liver abscess greater than 10 cm                                          | Percutaneous drainage                                                    | Surgery                       | Death, abscess resolution                                                |
| 35 | Tracheal stenosis by prolonged endotracheal intubation                                 | Endoscopic treatment                                                     | Surgical treatment            | Death, symptomatic improvement                                           |
| 36 | Patient with uncomplicated abdominal aortic aneurysm                                   | Endovascular treatment                                                   | Surgical treatment            | Death, complications                                                     |
| 37 | Patient with chlamydia post-infective reactive arthritis                               | Systemic steroids                                                        | Placebo                       | Symptomatic improvement                                                  |
| 38 | Patient with splenic abscess                                                           | Percutaneous drainage                                                    | Splenectomy                   | Death, complications                                                     |
| 39 | Patient with venous sinus thrombosis on anticoagulants                                 | Thrombophilia screening                                                  | No thrombophilia screening    | Recurrence, bleeding, death                                              |
| 40 | Patient with systemic sclerosis AND pulmonary hypertension                             | Heart-Lung Transplantation                                               | No Heart-Lung transplantation | Death                                                                    |
| 41 | Pregnant women                                                                         | Screening and treatment of CMV infection with intravenous immunoglobulin | No screening                  | Congenital infection                                                     |
| 42 | Patient with spontaneous Intracerebral Hemorrhage and suspected malformation-cavernoma | CTA                                                                      | Angio MRI                     | Death, malformation diagnosis                                            |
| 43 | Patient with ischemic heart disease                                                    | Discontinue aspirin                                                      | Continue aspirin              | Death, vascular events                                                   |

|    |                                                                            |                                                  |                                               |                                                             |
|----|----------------------------------------------------------------------------|--------------------------------------------------|-----------------------------------------------|-------------------------------------------------------------|
|    | undergoing non cardiovascular surgery                                      |                                                  |                                               |                                                             |
| 44 | Asymptomatic old patient                                                   | Hepres Zoster vaccine                            | No vaccine                                    | Zoster                                                      |
| 45 | Atrial fibrillation of indeterminate duration                              | Rythm control                                    | Frecuency control                             | Mortality, cardiac output                                   |
| 46 | Inpatient with acute COPD                                                  | Antibiotic therapy based on procalcitonin level  | Antibiotic therapy based on clinical criteria | Death, complications                                        |
| 47 | Patient with acute ischemic stroke                                         | Aspirin 325mg                                    | Aspirin 100mg                                 | New stroke, death, bleeding                                 |
| 48 | Patient with acute ischemic stroke and occlusion of arterial large vessels | Trombectomy                                      | Pharmacotherapy                               | Disability, death                                           |
| 49 | Patient with Lyme disease and central nervous system compromise            | Ceftriaxone                                      | Doxycycline                                   | Death, sequel                                               |
| 50 | Patient with chronic heart failure                                         | Pro-bnp guided treatment                         | No pro-BNP guided treatment                   | Death                                                       |
| 51 | Patient in early post neurosurgical period with acute PE                   | Anticoagulation                                  | Vena cava filter                              | Death, bleeding                                             |
| 52 | Patient with Spontaneous Intracerebral Hemorrhage                          | Antiepileptic drugs, primary prevention          | No antiepileptic drugs-primary prevention     | Seizures, death, disability                                 |
| 53 | Patient with subarachnoid bleeding and without seizures                    | Antiepileptic drugs, primary prevention          | No antiepileptic drugs-primary prevention     | Seizures, death, disability                                 |
| 54 | Patient with severe traumatic brain injury                                 | Antiepileptic drugs, primary prevention          | No antiepileptic drugs-primary prevention     | Seizures, death, disability                                 |
| 55 | Patient with ACS taking sildenafil in the last 6 hs                        | Nitroglycerin                                    | No nitroglycerin                              | Death, shock                                                |
| 56 | Patient undergoing renal transplant                                        | Perioperative pharmacologycal thromboprophylaxis | No thromboprophylaxis                         | Death, deep vein thromboses, oulmonary embolism, bleeding   |
| 57 | Patient with active cancer undergoing surgery                              | Extended thromboprophylaxis                      | Thromboprophylaxis during hospitalization     | Deep vein thromboses or pulmonary embolism, bleeding, death |
| 58 | Patient with subarachnoid bleeding                                         | Vasospasm screening with transcranial            | No doppler                                    | Death, complications                                        |

|    |                                                                                                      |                                                           |                                                       |                                       |
|----|------------------------------------------------------------------------------------------------------|-----------------------------------------------------------|-------------------------------------------------------|---------------------------------------|
|    |                                                                                                      | doppler                                                   |                                                       |                                       |
| 59 | Patient with subarachnoid bleeding                                                                   | Nimodipin                                                 | Placebo                                               | Death, complications                  |
| 60 | Patient with chronic leg ulcer and peripheral artery disease                                         | Hyperbaric oxygen therapy                                 | No hyperbaric oxygen therapy                          | Healing, death                        |
| 61 | Patient undergoing chemotherapy                                                                      | Erythropoiesis stimulating factors                        | Placebo                                               | HRQL, death, adverse events, anemia   |
| 62 | Patient with renal infarction                                                                        | Anticoagulation                                           | Aspirin                                               | Recurrent thrombotic event, bleeding  |
| 63 | Patient with post lumbar puncture headache                                                           | Caffeine                                                  | Placebo                                               | Pain improvement, adverse events      |
| 64 | Patient with TRALI                                                                                   | steroids                                                  | Placebo                                               | death                                 |
| 65 | Cancer patient with deep vein thrombosis/pulmonary embolism                                          | Low weight heparin                                        | VKA                                                   | Recurrent thrombotic event, death     |
| 66 | Patient with unprovoked deep vein thromboses who finish 3-6 month therapy of anticoagulant treatment | Aspirin                                                   | Placebo                                               | Recurrent deep vein thromboses, death |
| 67 | Diabetic patient who takes metformin undergoing IV contrast CT                                       | Discontinue metformin                                     | Continue metformin                                    | Lactic acidosis                       |
| 68 | Patient with evolved ischemic stroke and intracranial stenosis                                       | STENT                                                     | Medical therapy                                       | Recurrent stroke, death, bleeding     |
| 69 | Patient with cardiovascular risk factors who needs NSAIDs                                            | Naproxen                                                  | Other NSAIDs                                          | Major vascular events                 |
| 70 | Patient with dvt                                                                                     | Early deambulation                                        | Bed rest                                              | Pulmonary embolism, bleeding, death   |
| 71 | Patient with giant meningioma                                                                        | Pre-surgical embolization                                 | NO Pre-surgical embolization                          | Bleeding, death, disability           |
| 72 | Patient with cancer and deep vein thromboses                                                         | Enoxaparin 1 daily dose                                   | Enoxaparin 2 daily doses                              | New thrombotic event, bleeding        |
| 73 | Immunocompromised patient with pulmonary infiltrates                                                 | Determination of galactomannans in bronchoalveolar lavage | No Determination of galactomannans in bronchoalveolar | Death, adverse events                 |

|    |                                                                      |                                   |                              |                                                                            |
|----|----------------------------------------------------------------------|-----------------------------------|------------------------------|----------------------------------------------------------------------------|
|    |                                                                      |                                   | lavage                       |                                                                            |
| 74 | Metastatic renal cancer                                              | Nephrectomy                       | No nephrectomy               | Survival, adverse events                                                   |
| 75 | Patient with recent diagnosis of HIV and recent diagnosis of tb      | Immediate start of HAART          | Delay start of haart         | Death, complications                                                       |
| 76 | Patient with dizziness                                               | Ginkgo Biloba                     | Betahistin                   | symptomatic improvement, adverse events                                    |
| 77 | patient with superior vena cava syndrome                             | Stent                             | medical treatment            | symptomatic improvement, complications                                     |
| 78 | Patient with HIV related immune reconstitution inflammatory syndrome | steroids                          | Placebo                      | Death, symptomatic improvement                                             |
| 79 | Steroids-refractory Immune Thrombocytopenic Purpura                  | Rituximab                         | Steroids                     | bleeding, platelet count                                                   |
| 80 | Patient who had undergone endarterectomy                             | Aspirin                           | Aspirin and clopidogrel      | Stroke, death, bleeding                                                    |
| 81 | Patient with ureteral lithiasis                                      | Alpha adrenergic blockers         | Placebo                      | Pain, stone removal, adverse events                                        |
| 82 | Patient with recurrent reflex syncope                                | Midorine                          | Placebo                      | Symptomatic improvement, syncope recurrence, adverse events                |
| 83 | Patient with hyponatremia                                            | Urinary sodium measure            | Physical examination         | Symptomatic improvement                                                    |
| 84 | Patient with pre-diabetes                                            | Metformin                         | No pharmacological treatment | Microvascular complications (events), macrovascular complications (events) |
| 85 | Patient with mild or moderate idiopathic pulmonary fibrosis          | Pirfenidone                       | Placebo                      | Death, progresion, adverse events                                          |
| 86 | Patient with systolic heart failure                                  | Angiotensin-neprilysin inhibition | Enalapril                    | Death, vascular events, adverse events                                     |
| 87 | Patient with acute pharyngitis and severe Odynophagia                | Steroids                          | Placebo                      | Symptomatic improvement, adverse events                                    |
| 88 | Patient with aneurysmatic                                            | Surgical treatment                | Endovascular treatment       | Rebleeding, death, complications,                                          |

|     |                                                                        |                                                 |                          |                                                                     |
|-----|------------------------------------------------------------------------|-------------------------------------------------|--------------------------|---------------------------------------------------------------------|
|     | subarachnoid hemorrhage                                                |                                                 |                          | disability                                                          |
| 89  | Inpatient with pneumonia                                               | Betalactams                                     | Betalactams + macrolides | Death, mechanical ventilation, adverse events                       |
| 90  | Patient with moderate or severe dementia                               | Memantine                                       | Placebo                  | Cognitive status, functional status, adverse events                 |
| 91  | Patient with acute asthma                                              | Inhaled steroids                                | Placebo                  | Death, mechanical ventilation, hospitalization                      |
| 92  | Patient on anticoagulants undergoing central venous catheter insertion | Femoral                                         | Yugular                  | Death, hematoma, other complications, successful insertion          |
| 93  | Patient with acute asthma                                              | Non invasive ventilation AND standard treatment | Standard treatment       | Death, mechanical ventilation, hospitalization                      |
| 94  | Patient with non-convulsive epileptic status                           | Levetiracetam load dose                         | Phenytoin load dose      | Symptomatic improvement, death                                      |
| 95  | Women with osteoporosis and NO previous fracture                       | Vitamin K                                       | Placebo                  | Hip fracture, vertebral fracture                                    |
| 96  | Ratient with vertigo                                                   | Betahistin                                      | Placebo                  | Symptomatic improvement, adverse events                             |
| 97  | Patient with severe clostridium difficile infection                    | Metronidazol                                    | Vancomycin               | cure, recurrence, adverse events                                    |
| 98  | Patient undergoing knee or hip fracture surgery                        | Thromboprophilaxis with new oral anticoagulants | heparin                  | thromboembolic events, bleeding, death                              |
| 99  | Patient with acute ischemic stroke and low NIHSS score                 | Ticagrelor                                      | ASA                      | Recurrent stroke, bleeding, death                                   |
| 100 | Patient with asymptomatic cholelithiasis                               | Cholecystectomy                                 | Observation              | Cholelithiasis related complications, surgery related complications |

Nr: Question number
