# Supplementary material
Source: HighWire-hosted journal article supplement (https://bmjopen.bmj.com/content/7/8/e016113)
Supplement: inline-supplementary-material-6 [file inline-supplementary-material-6.pdf]

**Supplementary table 4. Potentially misleading recommendations description**

| Strategy      | Population                                               | Intervention                              | Information used                                                   | Information analysis                                                                               | Possible solution                                                                     |
|---------------|----------------------------------------------------------|-------------------------------------------|--------------------------------------------------------------------|----------------------------------------------------------------------------------------------------|---------------------------------------------------------------------------------------|
| Epistemonikos | Patient with cardiac dyspnea in the emergency department | Pro-BNP guided treatment                  | Adequate. A SR that included all the relevant information was used | Inappropriate judgment of the quality of evidence.                                                 | No solution                                                                           |
| Epistemonikos | Patient with asthma reagudization                        | Intravenous magnesium                     | Inappropriate. A recent systematic review was not identified       | -                                                                                                  | Appropriate use of the Epistemonikos matrix of evidence tool identified the missed SR |
| Epistemonikos | Patient with acute minor stroke                          | Mechanical thrombectomy                   | Inappropriate. A recent systematic review was not identified       | -                                                                                                  | Appropriate use of the Epistemonikos matrix of evidence tool identified the missed SR |
| Epistemonikos | Patient with acute pancreatitis                          | Early enteral nutrition                   | Adequate                                                           | Inappropriate judgment of the quality of evidence. Probable inappropriate summary of the evidence. | The recommendation was coherent with the GS when the same SoF was used                |
| Epistemonikos | Patient with tracheal stenosis                           | Mechanical dilatation                     | Adequate                                                           | Differences in the benefit risk balance judgment                                                   | No Solution                                                                           |
| Epistemonikos | Patient with recent TB/HIV co-infection diagnoses        | Early antiretroviral treatment initiation | Adequate                                                           | Differences in the benefit risk balance judgment. Probable inappropriate summary of the evidence.  | The recommendation was coherent with the GS when the same SoF was used                |

|               |                                                            |                        |                                                              |                                                                                                    |                                                                                       |
|---------------|------------------------------------------------------------|------------------------|--------------------------------------------------------------|----------------------------------------------------------------------------------------------------|---------------------------------------------------------------------------------------|
| Epistemonikos | Patient with osteoporosis                                  | Vitamin K              | Adequate                                                     | Differences in the benefit risk balance judgment                                                   | No solution                                                                           |
| Epistemonikos | Patient with asymptomatic cholelithiasis                   | No surgical treatment  | Inappropriate. One relevant publication not identified       | -                                                                                                  | No solution                                                                           |
| PubMed        | Patient with acute aneurysmal rupture with SAH             | Endovascular treatment | Inappropriate. Two relevant publications not identified      | -                                                                                                  | No solution                                                                           |
| PubMed        | Patient with traumatic SHA                                 | Nimodipine             | Appropriate                                                  | Inappropriate judgment of the quality of evidence. Probable inappropriate summary of the evidence. | The recommendation was coherent with the GS when the same SoF was used                |
| PubMed        | Patient with systemic sclerosis and severe lung compromise | Lung transplantation   | Appropriate                                                  | Differences in the benefit risk balance judgment                                                   | No solution                                                                           |
| PubMed        | Patient with chronic heart failure                         | BNP guided therapy     | Inappropriate. A recent systematic review was not identified | -                                                                                                  | Appropriate use of the Epistemonikos matrix of evidence tool identified the missed SR |
| PubMed        | Patient with severe Clostridium Difficile infection        | Vancomycin             | Inappropriate. A recent systematic review was not identified | -                                                                                                  | No Solution                                                                           |
